# Supplementary material
Source: PubMed Central journal article supplement (PMC152814)
Supplement: nar_31_7_1984__1.pdf [file nar_31_7_1984__1.pdf]

**Figure S1.** Calculated electrostatic charges on O<sup>6</sup>-[4-oxo[3-pyridyl]butyl]guanine

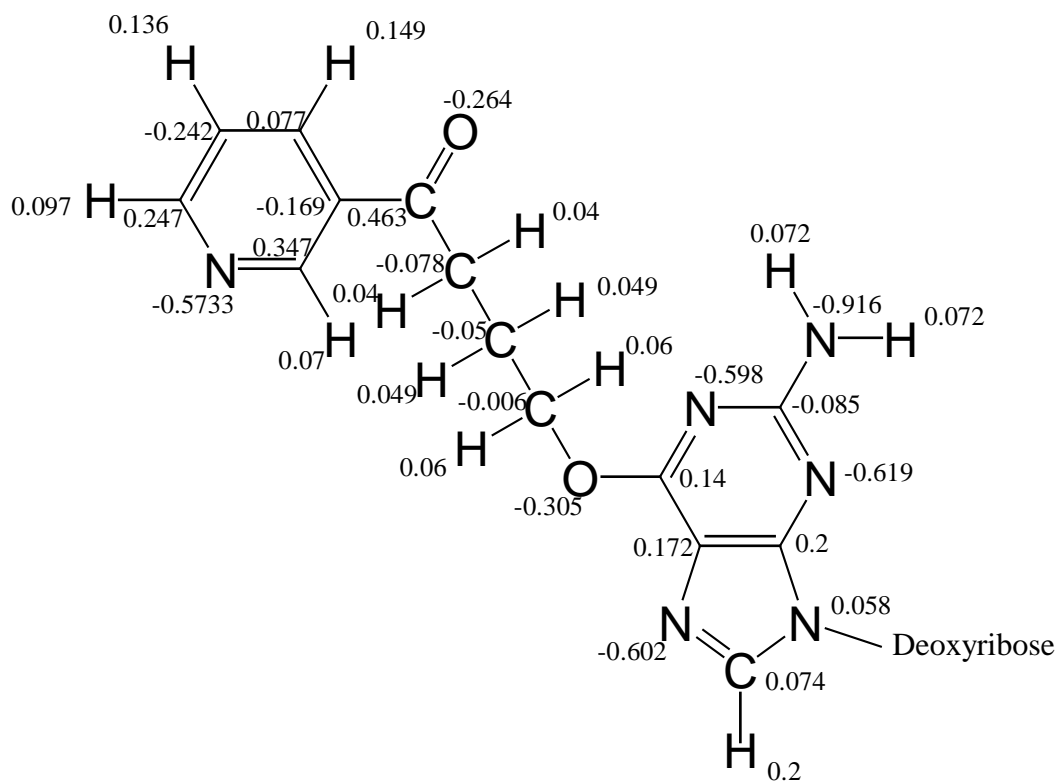

**Table S1.** Bond, angle, and torsion parameters for O<sup>6</sup>-[4-oxo[3-pyridyl]butyl]guanine

| Bond        | Kcal/mol (Å) <sup>2</sup> | Å        |         |    |
|-------------|---------------------------|----------|---------|----|
| CA-OS       | 450.0                     | 1.364    |         |    |
| Angle       | Kcal/mol rad <sup>2</sup> | degrees  |         |    |
| NC-CA-CA    | 70.0                      | 120.00   |         |    |
| NC-CA-OS    | 80.0                      | 120.00   |         |    |
| NC-CA-H4    | 35.0                      | 120.00   |         |    |
| CA-NC-CA    | 70.0                      | 120.00   |         |    |
| CA-C -CT    | 70.0                      | 120.00   |         |    |
| CA-C -O     | 80.0                      | 120.00   |         |    |
| CT-OS-CA    | 60.0                      | 120.00   |         |    |
| CA-CA-OS    | 80.0                      | 120.00   |         |    |
| NC-CA-NC    | 70.0                      | 129.10   |         |    |
| CB-CA-OS    | 80.0                      | 120.00   |         |    |
| Torsion     |                           | Kcal/mol | degrees |    |
| CT-CT-CT-OS | 1                         | 1.25     | 0.0     | 2  |
| C -CT-CT-CT | 1                         | 1.25     | 0.0     | -3 |
| C -CT-CT-CT | 1                         | 0.15     | 180     | -2 |
| C -CT-CT-CT | 1                         | 0.25     | 180     | 1  |
| X -CA-OS-X  | 3                         | 1.5      | 0.0     | 3  |

**Figure S2** Root mean square deviations (RMSD) from the starting structure for the POB- and Me- guanine containing duplex DNA. POB-duplex values are shown as a solid line and Me-duplex as a dotted line.

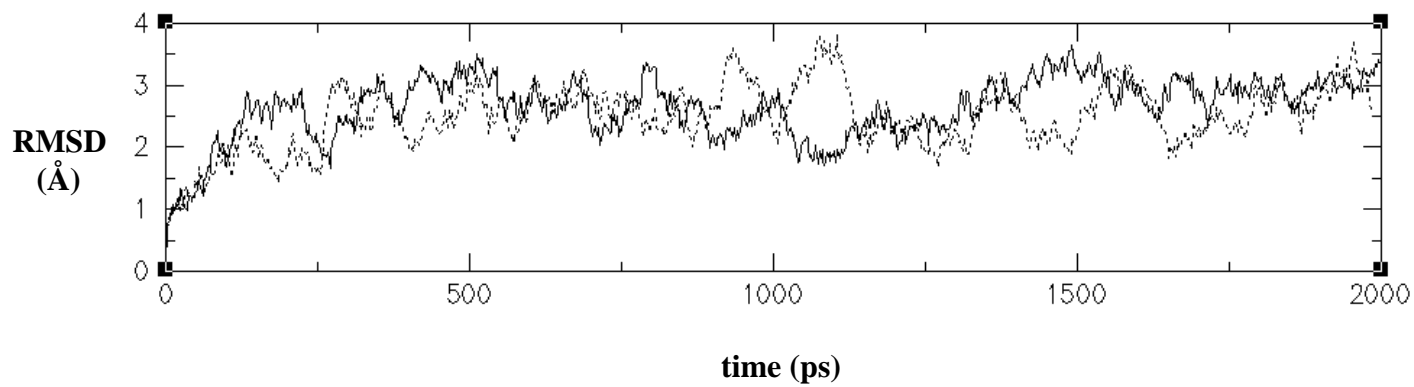

**Figure S3.** MALDI-TOF MS analysis of *E. Coli* Polymerase I digests of single-stranded DNA substrates containing O<sup>6</sup>-guanine lesions d(AACAGCCATATGXCCC): (A) X = O<sup>6</sup>-POB-dG, (B) X = O<sup>6</sup>-Me-dG. Both incubations were performed at identical conditions. Arrows indicate the portion of the sequence represented in the spectra, and doubly charged ions are marked with #.

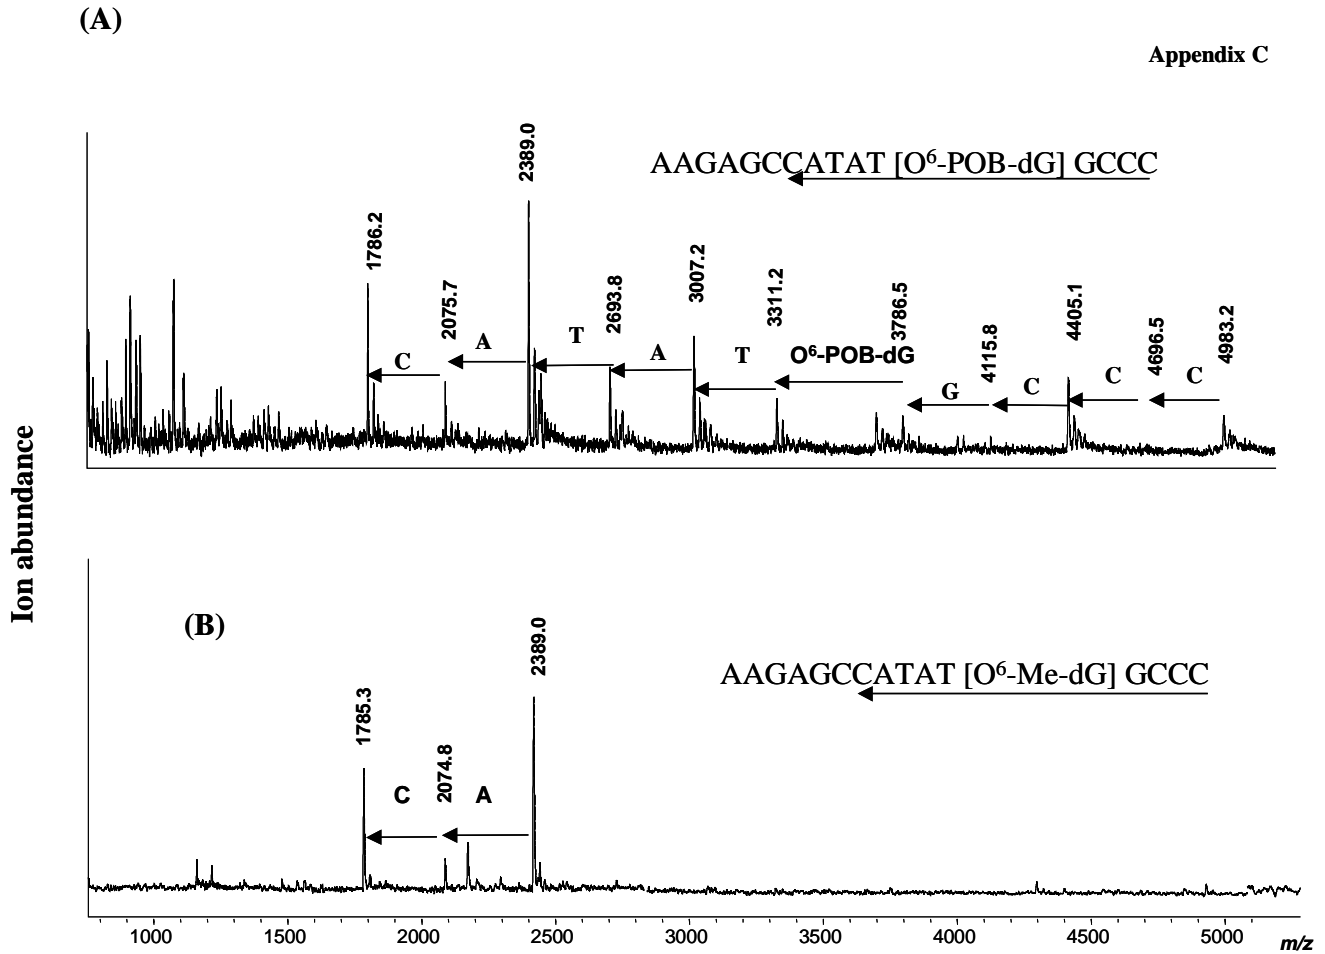

**Figure S4.** MALDI-TOF mass spectra of the time-controlled 3'-exonuclease digests of single-stranded DNA 16-mers containing O<sup>6</sup>-guanine lesions d(AACAGCCATATGXCCC) in the presence of T4 DNA Polymerase: (A) X = O<sup>6</sup>-POB-dG, (B) X = O<sup>6</sup>-Me-dG. Arrows indicate the portion of the sequence represented in the spectra.

Appendix D

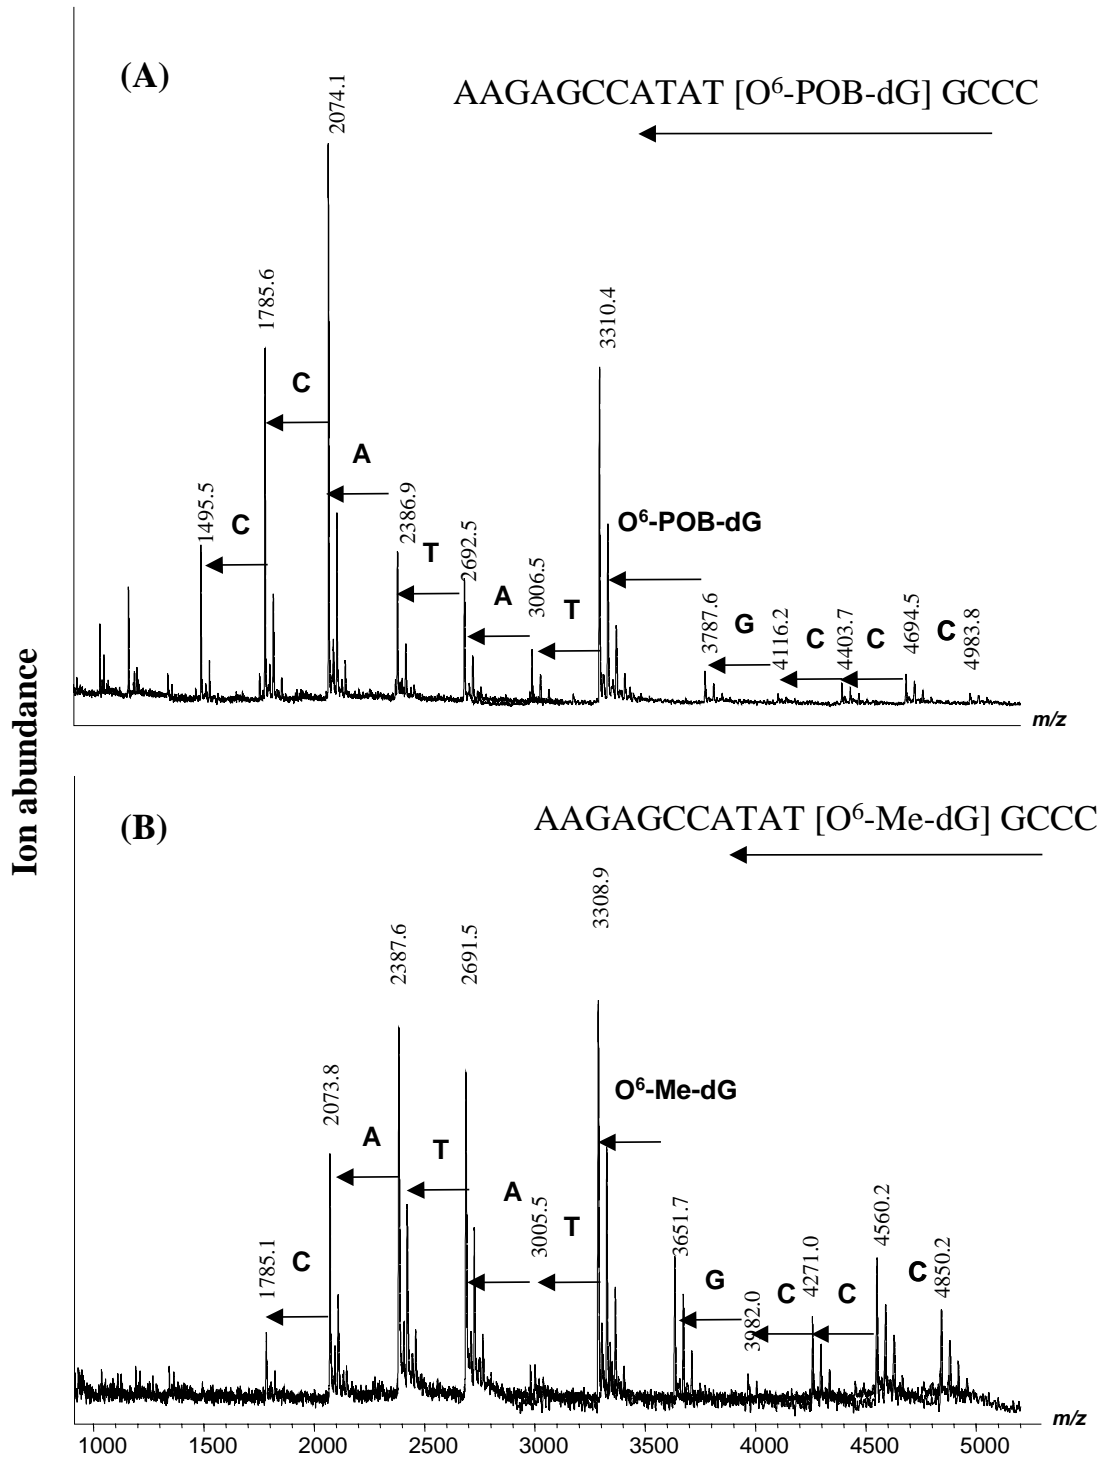

**Table S2 Average sugar pucker, glycosidic and backbone torsions and the Watson-Crick base pairing distances for the last 200 ps of the 2 ns simulation, for the POB-adduct modified DNA duplex**

|     | $\alpha^\circ$ | $\beta^\circ$ | $\gamma^\circ$ | $\delta^\circ$ | $\epsilon^\circ$ | $\zeta^\circ$ | $\chi^\circ$ | Sugar pucker <sup>o</sup> | H-bond distance (Å) |
|-----|----------------|---------------|----------------|----------------|------------------|---------------|--------------|---------------------------|---------------------|
|     | P-O5'          | O5'-C5'       | C5'-C4'        | C4'-C3'        | C3'-O3'          | O3'-P         |              |                           |                     |
| C1  |                |               |                |                |                  |               | -125         | 134                       | 3.0, 3.0, 2.9       |
| A2  | -72            | 175           | 55             | 117            | -171             | -97           | -118         | 138                       | 2.9, 3.0            |
| T3  | -70            | 167           | 63             | 116            | -177             | -100          | -121         | 132                       | 3.0, 3.0            |
| A4  | -67            | 175           | 60             | 122            | -175             | -90           | -117         | 149                       | 3.0, 3.0            |
| T5  | -73            | 173           | 60             | 119            | -159             | -82           | -120         | 129                       | 2.9, 3.1            |
|     |                |               |                |                |                  |               |              |                           |                     |
| G6  | -114           | 171           | 59             | 123            | -124             | -180          | -113         | -7                        | 7.5, 5.2, 3.7       |
|     |                |               |                |                |                  |               |              |                           |                     |
| G7  | -69            | 179           | 60             | 127            | -170             | -91           | -104         | 150                       | 3.0, 2.9, 2.9       |
| C8  | -68            | 169           | 63             | 129            | -176             | -93           | -131         | 125                       | 3.0, 2.9, 2.9       |
| C9  | -70            | 170           | 60             | 115            | -173             | -92           | -128         | 116                       | 2.9, 3.0, 2.9       |
| C10 |                | 176           | 56             | 123            |                  |               | -99          | 153                       | 3.5, 3.1, 2.9       |
|     |                |               |                |                |                  |               |              |                           |                     |
| G11 |                |               |                |                |                  |               | -27          | 134                       |                     |
| G12 | -69            | 172           | 60             | 113            | -174             | -97           | -90          | 171                       |                     |
| G13 | -75            | 174           | 59             | 106            | -168             | -88           | -112         | 159                       |                     |
| C14 | -71            | 172           | 58             | 99             | -168             | -85           | -113         | 146                       |                     |
| C15 | -63            | 173           | 60             | 129            | -117             | -87           | -132         | 94                        |                     |
| A16 | -70            | 168           | 61             | 112            | -173             | -90           | -103         | 142                       |                     |
| T17 | -72            | 174           | 58             | 117            | -174             | -88           | -118         | 127                       |                     |
| A18 | -69            | 174           | 54             | 115            | -172             | -89           | -123         | 147                       |                     |
| T19 | -76            | 167           | 59             | 119            | -141             | -137          | -119         | 138                       |                     |
| G20 |                | 165           | 53             | 138            |                  |               | -120         | 143                       |                     |
|     |                |               |                |                |                  |               |              |                           |                     |
| avg | -73            | 172           | 59             | 119            | -163             | -99           | -112         | 131                       |                     |

**Table S3 Average standard deviations ( $\sigma$ ) for the sugar pucker, glycosidic and backbone torsions and the Watson-Crick base pairing distances for the last 200 ps of the 2 ns simulation, for the POB-adduct modified DNA duplex**

|            | $\alpha^\circ$ | $\beta^\circ$ | $\gamma^\circ$ | $\delta^\circ$ | $\epsilon^\circ$ | $\zeta^\circ$ | $\chi^\circ$ | Sugar pucker $^\circ$ | H-bond distance (Å)  |
|------------|----------------|---------------|----------------|----------------|------------------|---------------|--------------|-----------------------|----------------------|
| <b>C1</b>  |                |               |                |                |                  |               | <b>19</b>    | <b>36</b>             | <b>0.2, 0.1, 0.1</b> |
| <b>A2</b>  | <b>11</b>      | <b>12</b>     | <b>9</b>       | <b>15</b>      | <b>9</b>         | <b>15</b>     | <b>15</b>    | <b>20</b>             | <b>0.1, 0.2</b>      |
| <b>T3</b>  | <b>11</b>      | <b>10</b>     | <b>9</b>       | <b>16</b>      | <b>12</b>        | <b>19</b>     | <b>15</b>    | <b>17</b>             | <b>0.1, 0.2</b>      |
| <b>A4</b>  | <b>9</b>       | <b>11</b>     | <b>9</b>       | <b>15</b>      | <b>9</b>         | <b>10</b>     | <b>12</b>    | <b>24</b>             | <b>0.1, 0.2</b>      |
| <b>T5</b>  | <b>10</b>      | <b>9</b>      | <b>9</b>       | <b>14</b>      | <b>13</b>        | <b>12</b>     | <b>12</b>    | <b>16</b>             | <b>0.1, 0.3</b>      |
| <b>G6</b>  | <b>38</b>      | <b>9</b>      | <b>9</b>       | <b>16</b>      | <b>44</b>        | <b>64</b>     | <b>9</b>     | <b>20</b>             | <b>0.4, 0.2, 0.4</b> |
| <b>G7</b>  | <b>9</b>       | <b>14</b>     | <b>12</b>      | <b>21</b>      | <b>13</b>        | <b>17</b>     | <b>11</b>    | <b>14</b>             | <b>0.2, 0.1, 0.1</b> |
| <b>C8</b>  | <b>10</b>      | <b>9</b>      | <b>9</b>       | <b>9</b>       | <b>9</b>         | <b>9</b>      | <b>13</b>    | <b>20</b>             | <b>0.2, 0.1, 0.1</b> |
| <b>C9</b>  | <b>13</b>      | <b>10</b>     | <b>10</b>      | <b>13</b>      | <b>8</b>         | <b>9</b>      | <b>14</b>    | <b>30</b>             | <b>0.2, 0.1, 0.1</b> |
| <b>C10</b> |                | <b>10</b>     | <b>10</b>      | <b>15</b>      |                  |               | <b>18</b>    | <b>19</b>             | <b>1.0, 0.4, 0.3</b> |
| <b>G11</b> |                |               |                |                |                  |               | <b>28</b>    | <b>14</b>             |                      |
| <b>G12</b> | <b>10</b>      | <b>11</b>     | <b>8</b>       | <b>15</b>      | <b>9</b>         | <b>15</b>     | <b>17</b>    | <b>13</b>             |                      |
| <b>G13</b> | <b>11</b>      | <b>10</b>     | <b>9</b>       | <b>19</b>      | <b>8</b>         | <b>16</b>     | <b>11</b>    | <b>23</b>             |                      |
| <b>C14</b> | <b>12</b>      | <b>10</b>     | <b>9</b>       | <b>18</b>      | <b>12</b>        | <b>20</b>     | <b>12</b>    | <b>14</b>             |                      |
| <b>C15</b> | <b>8</b>       | <b>10</b>     | <b>9</b>       | <b>11</b>      | <b>10</b>        | <b>8</b>      | <b>11</b>    | <b>28</b>             |                      |
| <b>A16</b> | <b>10</b>      | <b>9</b>      | <b>10</b>      | <b>12</b>      | <b>9</b>         | <b>11</b>     | <b>14</b>    | <b>18</b>             |                      |
| <b>T17</b> | <b>11</b>      | <b>10</b>     | <b>8</b>       | <b>13</b>      | <b>8</b>         | <b>10</b>     | <b>19</b>    | <b>17</b>             |                      |
| <b>A18</b> | <b>10</b>      | <b>9</b>      | <b>9</b>       | <b>12</b>      | <b>10</b>        | <b>10</b>     | <b>12</b>    | <b>21</b>             |                      |
| <b>T19</b> | <b>15</b>      | <b>9</b>      | <b>9</b>       | <b>16</b>      | <b>42</b>        | <b>54</b>     | <b>12</b>    | <b>16</b>             |                      |
| <b>G20</b> |                | <b>16</b>     | <b>11</b>      | <b>14</b>      |                  |               | <b>15</b>    | <b>15</b>             |                      |

**Table S4 Average sugar pucker, glycosidic and backbone torsions and the Watson-Crick base pairing distances over the course of the 2.0 ns simulation, for the O6-methyl guanine containing DNA duplex**

|     | $\alpha^\circ$ | $\beta^\circ$ | $\gamma^\circ$ | $\delta^\circ$ | $\epsilon^\circ$ | $\zeta^\circ$ | $\chi^\circ$ | Sugar pucker $^\circ$ | H-bond distance (Å) |
|-----|----------------|---------------|----------------|----------------|------------------|---------------|--------------|-----------------------|---------------------|
|     | P-O5'          | O5'-C5'       | C5-C4'         | C4'-C3'        | C3'-O3'          | O3'-P         |              |                       |                     |
| C1  |                |               |                |                |                  |               | -128         | 125                   | 3.0, 3.0, 2.9       |
| A2  |                | 173           | 60             | 126            | -177             | -95           | -116         | 148                   | 2.9, 3.0            |
| T3  | -68            | 170           | 62             | 111            | -170             | -87           | -128         | 119                   | 2.9, 3.1            |
| A4  | -72            | 175           | 55             | 115            | -171             | -91           | -128         | 129                   | 2.9, 3.0            |
| T5  | -71            | 175           | 56             | 119            | -168             | -85           | -113         | 134                   | 3.0, 3.0            |
| G6  | -74            | 165           | 57             | 120            | -148             | -134          | -104         | 133                   | 3.7, 3.6, 3.6       |
| G7  | -72            | 162           | 57             | 119            | -174             | -91           | -130         | 136                   | 3.0, 3.0, 2.9       |
| C8  | -71            | 173           | 60             | 117            | -178             | -93           | -128         | 133                   | 3.0, 2.9, 2.9       |
| C9  | -69            | 180           | 56             | 117            | -165             | -84           | -130         | 131                   | 2.9, 2.9, 2.9       |
| C10 | -74            | 169           | 55             | 128            |                  |               | -105         | 138                   | 3.0, 3.0, 2.9       |
| G11 |                |               |                |                |                  |               | -59          | 141                   |                     |
| G12 |                | 159           | 60             | 139            | -179             | -97           | -107         | 169                   |                     |
| G13 | -69            | 174           | 58             | 116            | -176             | -90           | -127         | 131                   |                     |
| C14 | -68            | 173           | 60             | 113            | -170             | -88           | -130         | 126                   |                     |
| C15 | -73            | 175           | 55             | 113            | -174             | -87           | -127         | 126                   |                     |
| A16 | -70            | 171           | 58             | 110            | -173             | -91           | -127         | 125                   |                     |
| T17 | -68            | 169           | 60             | 116            | -174             | -90           | -120         | 130                   |                     |
| A18 | -69            | 168           | 58             | 111            | -176             | -93           | -130         | 125                   |                     |
| T19 | -68            | 174           | 60             | 116            | -174             | -91           | -126         | 129                   |                     |
| G20 | -72            | 177           | 55             | 133            |                  |               | -113         | 146                   |                     |
| avg | -71            | 171           | 58             | 119            | -172             | -93           | -119         | 134                   |                     |
